# Supplementary material
Source: MDPI journal article supplement (https://www.mdpi.com/2075-163X/9/8/465)
Supplement: s1 [file s1]

**Table 2.** Number of mineral species and mean, minimum, maximum values of bulk (in wt %) and trace-element (in ppm) compositions of Hatrurim larnite CM rocks.

| Component/<br>Element              | N  | Oxide<br>Mean | S    | Min   | Max   | Mean.,<br>ppm | [A], Atomic<br>ppm | lgA   | S  | lgS  |
|------------------------------------|----|---------------|------|-------|-------|---------------|--------------------|-------|----|------|
| Bulk composition (in wt %)         |    |               |      |       |       |               |                    |       |    |      |
| O**                                | -  | -             | -    | -     | -     | 409663        | 25604              | 4.41  | 59 | 1.77 |
| SiO <sub>2</sub>                   | 29 | 23.97         | 1.66 | 19.8  | 27.1  | 112078        | 3990               | 3.60  | 28 | 1.45 |
| TiO <sub>2</sub>                   | 29 | 0.40          | 0.03 | 0.30  | 0.50  | 2420          | 50.56              | 1.70  | 5  | 0.70 |
| Al <sub>2</sub> O <sub>3</sub>     | 29 | 10.51         | 1.19 | 7.92  | 12.5  | 27814         | 1031               | 3.01  | 14 | 1.15 |
| Fe <sub>2</sub> O <sub>3</sub>     | 29 | 3.29          | 1.32 | 0.80  | 5.00  | 11510         | 237.7              | 2.38* | 19 | 1.28 |
| FeO                                | 11 | 0.51          | 0.29 | <0.10 | 1.03  | 1768          |                    |       |    |      |
| MgO                                | 29 | 0.90          | 0.28 | 0.50  | 1.78  | 5451          | 224.2              | 2.35  | 9  | 0.95 |
| CaO                                | 29 | 53.6          | 2.16 | 50.8  | 58.0  | 382842        | 9552               | 3.98  | 49 | 1.69 |
| Na <sub>2</sub> O                  | 20 | 0.36          | 0.17 | 0.13  | 0.75  | 1331          | 57.91              | 1.76  | 4  | 0.60 |
| K <sub>2</sub> O                   | 29 | 0.40          | 0.35 | 0.07  | 2.43  | 1670          | 42.70              | 1.63  | 7  | 0.85 |
| P <sub>2</sub> O <sub>5</sub>      | 29 | 2.24          | 0.54 | 0.78  | 4.20  | 4887          | 157.8              | 2.20  | 5  | 0.70 |
| F                                  | 9  | -             | 0.07 | <0.03 | 0.24  | 1243          | 65.42              | 1.82  | 6  | 0.78 |
| SO <sub>3</sub>                    | 23 | 1.66          | 1.46 | <0.05 | 4.97  | 6637          | 207.0              | 2.32  | 18 | 1.26 |
| Trace element composition (in ppm) |    |               |      |       |       |               |                    |       |    |      |
| Be                                 | 9  | -             | 0.44 | 0.60  | 8.50  | 0.96          | 0.106              | -0.97 | nd | -    |
| B                                  | 14 | -             | 21.4 | 11.9  | 103   | 35.5          | 3.281              | 0.52  | nd | -    |
| V                                  | 27 | -             | 55.7 | 24.2  | 205   | 97.6          | 1.915              | 0.28  | nd | -    |
| Cr                                 | 27 | -             | 170  | 40.6  | 693   | 327           | 6.285              | 0.80  | nd | -    |
| Mn                                 | 29 | -             | 535  | 20.0  | 2013  | 486           | 8.850              | 0.95  | nd | -    |
| Co                                 | 9  | -             | 2.14 | 2.00  | 9.00  | 4.29          | 0.072              | -1.14 | nd | -    |
| Ni                                 | 27 | -             | 64.3 | 44.2  | 269   | 135           | 2.304              | 0.36  | 1  | 0.00 |
| Cu                                 | 27 | -             | 27.7 | 10.0  | 157   | 43.4          | 0.682              | -0.17 | 8  | 0.90 |
| Zn                                 | 27 | -             | 131  | 24.0  | 474   | 178           | 2.722              | 0.43  | nd | -    |
| Ga                                 | 18 | -             | 4.08 | 4.79  | 11.5  | 8.12          | 0.116              | -0.93 | nd | -    |
| Ge                                 | 18 | -             | 0.89 | <0.20 | 3.02  | 1.30          | 0.018              | -1.75 | nd | -    |
| As                                 | 27 | -             | 7.46 | <0.80 | 41.0  | 16.5          | 0.220              | -0.66 | nd | -    |
| Se                                 | 18 | -             | 9.53 | <0.20 | 96.2  | 7.98          | 0.101              | -1.00 | 3  | 0.48 |
| Rb                                 | 18 | -             | 4.04 | 1.85  | 31.9  | 5.94          | 0.070              | -1.16 | nd | -    |
| Sr                                 | 27 | -             | 355  | 1146  | 2903  | 1827          | 20.85              | 1.32  | nd | -    |
| Y                                  | 18 | -             | 21.3 | 30.7  | 69.2  | 41.7          | 0.469              | -0.33 | nd | -    |
| Zr                                 | 18 | -             | 33.8 | 51.9  | 80.4  | 68.1          | 0.747              | -0.13 | 1  | 0.00 |
| Nb                                 | 18 | -             | 3.89 | 3.10  | 10.7  | 7.43          | 0.080              | -1.10 | nd | -    |
| Mo                                 | 27 | -             | 6.64 | 0.48  | 28.0  | 11.0          | 0.115              | -0.94 | nd | -    |
| Ag                                 | 14 | -             | 0.41 | 0.02  | 2.89  | 0.49          | 0.005              | -2.34 | 2  | 0.30 |
| Cd                                 | 9  | -             | 0.13 | 0.10  | 0.50  | 0.14          | 0.001              | -2.90 | nd | -    |
| Sb                                 | 9  | -             | 0.21 | 0.40  | 1.20  | 0.46          | 0.004              | -2.43 | nd | -    |
| Ba                                 | 27 | -             | 515  | 19.0  | 5025  | 392           | 2.856              | 0.46  | 5  | 0.70 |
| Pb                                 | 27 | -             | 4.80 | <0.80 | 46.70 | 3.83          | 0.019              | -1.73 | nd | -    |
| Th                                 | 27 | -             | 3.25 | <1.00 | 12.6  | 6.14          | 0.026              | -1.58 | nd | -    |
| U                                  | 27 | -             | 9.01 | <1.00 | 62.4  | 12.8          | 0.054              | -1.27 | 2  | 0.30 |

N = number of samples; Mean = average value; S = standard deviation; Min = minimum value; Max = maximum value; A= concentration (element average in atomic ppm); S = number of mineral species; n.d. = not detected. \* Fe<sub>2</sub>O<sub>3</sub> and FeO are calculated jointly; \*\*calculated. H, C: 1 mineral found.
